# Supplementary material for: Kinetic profiling of metabolic specialists demonstrates stability and consistency of in vivo enzyme turnover numbers
Source: PubMed Central journal article supplement — Proc Natl Acad Sci U S A. 2020 Sep 1;117(37):23182–90. doi: 10.1073/pnas.2001562117 (PMC7502767; doi:10.1073/pnas.2001562117), 2020-09-01
Supplement: pnas.2001562117.sapp.pdf [file pnas.2001562117.sapp.pdf]

## **Supporting Information for**

### **Kinetic profiling of metabolic specialists demonstrates stability and consistency of in vivo enzyme turnover numbers**

David Heckmann<sup>1\*</sup>, Anaamika Campeau<sup>2</sup>, Colton J. Lloyd<sup>1</sup>, Patrick V. Phaneuf<sup>1</sup>, Ying Hefner<sup>1</sup>, Marvic Carrillo-Terrazas<sup>2</sup>, Adam M. Feist<sup>1,3</sup>, David J. Gonzalez<sup>2</sup>, Bernhard O. Palsson<sup>1,3\*</sup>

<sup>1</sup>Department of Bioengineering, University of California San Diego, La Jolla, California 92093, USA

<sup>2</sup>Department of Pharmacology, Skaggs School of Pharmacy and Pharmaceutical Sciences, University of California San Diego, La Jolla, California 92093, USA

<sup>3</sup>The Novo Nordisk Foundation Center for Biosustainability, Technical University of Denmark, 2800 Lyngby, Denmark

\* Correspondence should be addressed to David Heckmann or Bernhard O. Palsson.

**Email:** david.heckmann@hhu.de, palsson@ucsd.edu

Table S1: Correlation between biological replicates and coverage of proteomics samples. The  $R^2$  of protein abundance on log scale between two biological replicates is shown along with the number of unique proteins that were detected in at least one of the two replicates.

| strain    | $R^2$ between biological replicates | number of proteins detected |
|-----------|-------------------------------------|-----------------------------|
| WT 1      | 0.92275                             | 2105                        |
| WT 2      | 0.818324                            | 2066                        |
| pgi 1     | 0.862347                            | 2076                        |
| pgi 2     | 0.928284                            | 2158                        |
| pgi 3     | 0.85155                             | 2161                        |
| pgi 4     | 0.904126                            | 2117                        |
| pgi 5     | 0.912196                            | 2164                        |
| pgi 6     | 0.919021                            | 2017                        |
| pgi 7     | 0.883619                            | 2033                        |
| pgi 8     | 0.884893                            | 2045                        |
| ptsHlcr 1 | 0.920072                            | 2132                        |
| ptsHlcr 2 | 0.908835                            | 2138                        |
| ptsHlcr 3 | 0.92805                             | 2129                        |
| ptsHlcr 4 | 0.897441                            | 2159                        |
| sdhCB 1   | 0.923292                            | 1934                        |
| sdhCB 2   | 0.920167                            | 2033                        |
| sdhCB 3   | 0.849117                            | 1981                        |
| tpiA 1    | 0.921315                            | 2147                        |

|        |          |      |
|--------|----------|------|
| tpiA 2 | 0.923444 | 2003 |
| tpiA 3 | 0.913019 | 1818 |
| tpiA 4 | 0.927285 | 1991 |

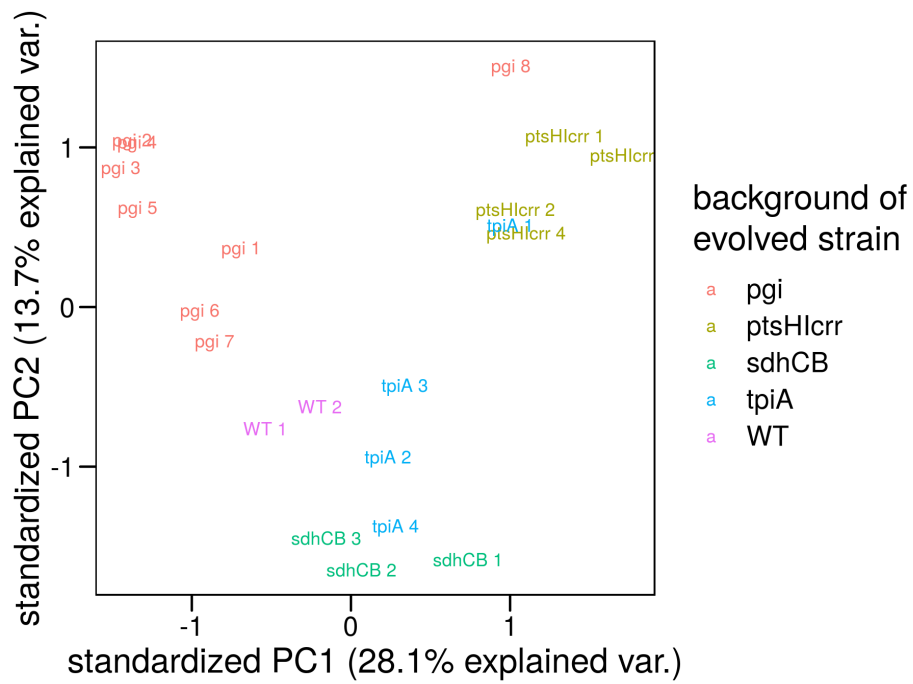

Figure S1: PCA biplot of protein abundances. Protein abundances were log-transformed, centered, and scaled. Only proteins that were detected in all samples were used for this analysis (n = 829).

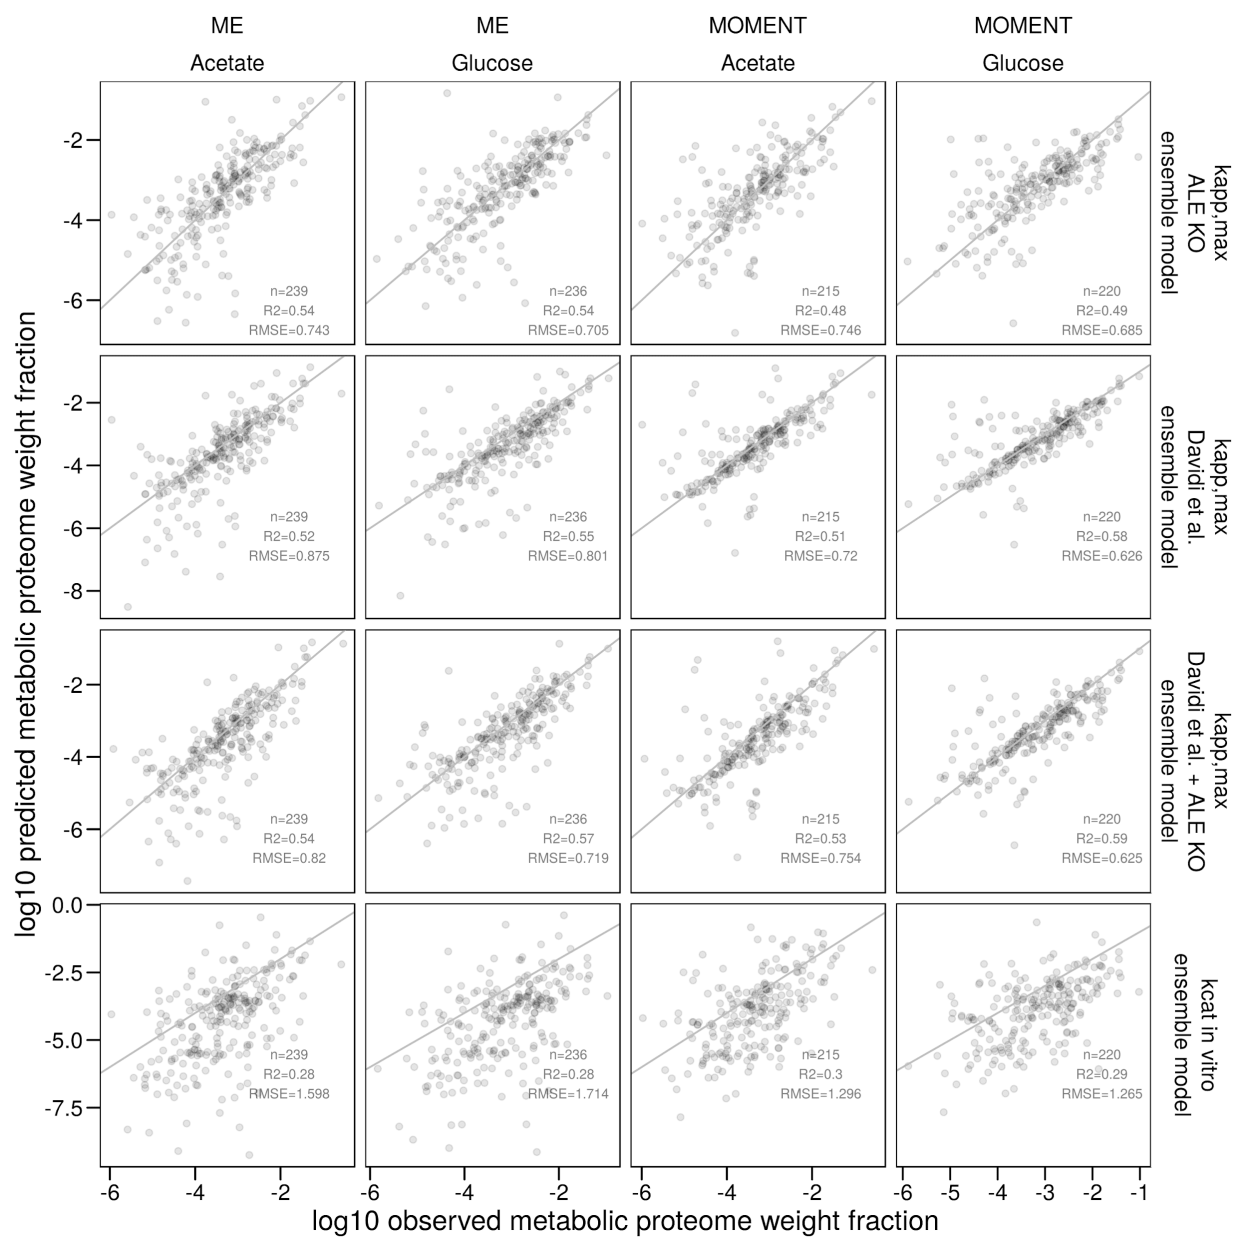

Figure S2: Direct comparison of protein abundance predictions with measured data for different  $k_{cat}$  parameterizations. Proteomics data for growth on glucoses and acetate from Schmidt et al.<sup>1</sup> is shown as examples.

## Other Supporting Information Files

Dataset S1 (separate file). Protein abundances, MFA fluxes, and  $k_{\text{app}}$ s (S1A). Table of  $k_{\text{app,max}}$ s (S1B). Table of  $k_{\text{cat}}$  in vitro and  $k_{\text{app,max}}$  extrapolated with machine learning models or the median (S1C). These were used to parameterize mechanistic genome-scale models. Mutation table of the strains used in this study (S1D). Details on all data sets are given in Dataset S1.

## SI References

1. Schmidt, A. *et al.* The quantitative and condition-dependent Escherichia coli proteome. *Nat. Biotechnol.* **34**, 104–110 (2016).
